# Supplementary material for: Production and Characterization of Superhydrophobic and Antibacterial Coated Fabrics Utilizing ZnO Nanocatalyst
Source: PubMed Central journal article supplement (PMC5834644; doi:10.1038/s41598-018-22324-7), 2018-03-02
Supplement: 41598_2018_22324_MOESM1_ESM.pdf [file 41598_2018_22324_MOESM1_ESM.pdf]

## **Supplementary data**

### **Production and Characterization of Superhydrophobic and Antibacterial Coated Fabrics Utilizing ZnO Nanocatalyst**

Mohamed Shaban<sup>1,\*</sup>, Fatma Mohamed<sup>1,2</sup>, Semsem Abdallah<sup>1,2</sup>

<sup>1</sup> Nanophotonics and Applications (NPA) Lab, Department of Physics, Faculty of Science, Beni - Suef University, Beni-Suef, 62514, Egypt

<sup>2</sup> Department of Chemistry, Faculty of Science, Beni-Suef University, Beni-Suef 62111, Egypt

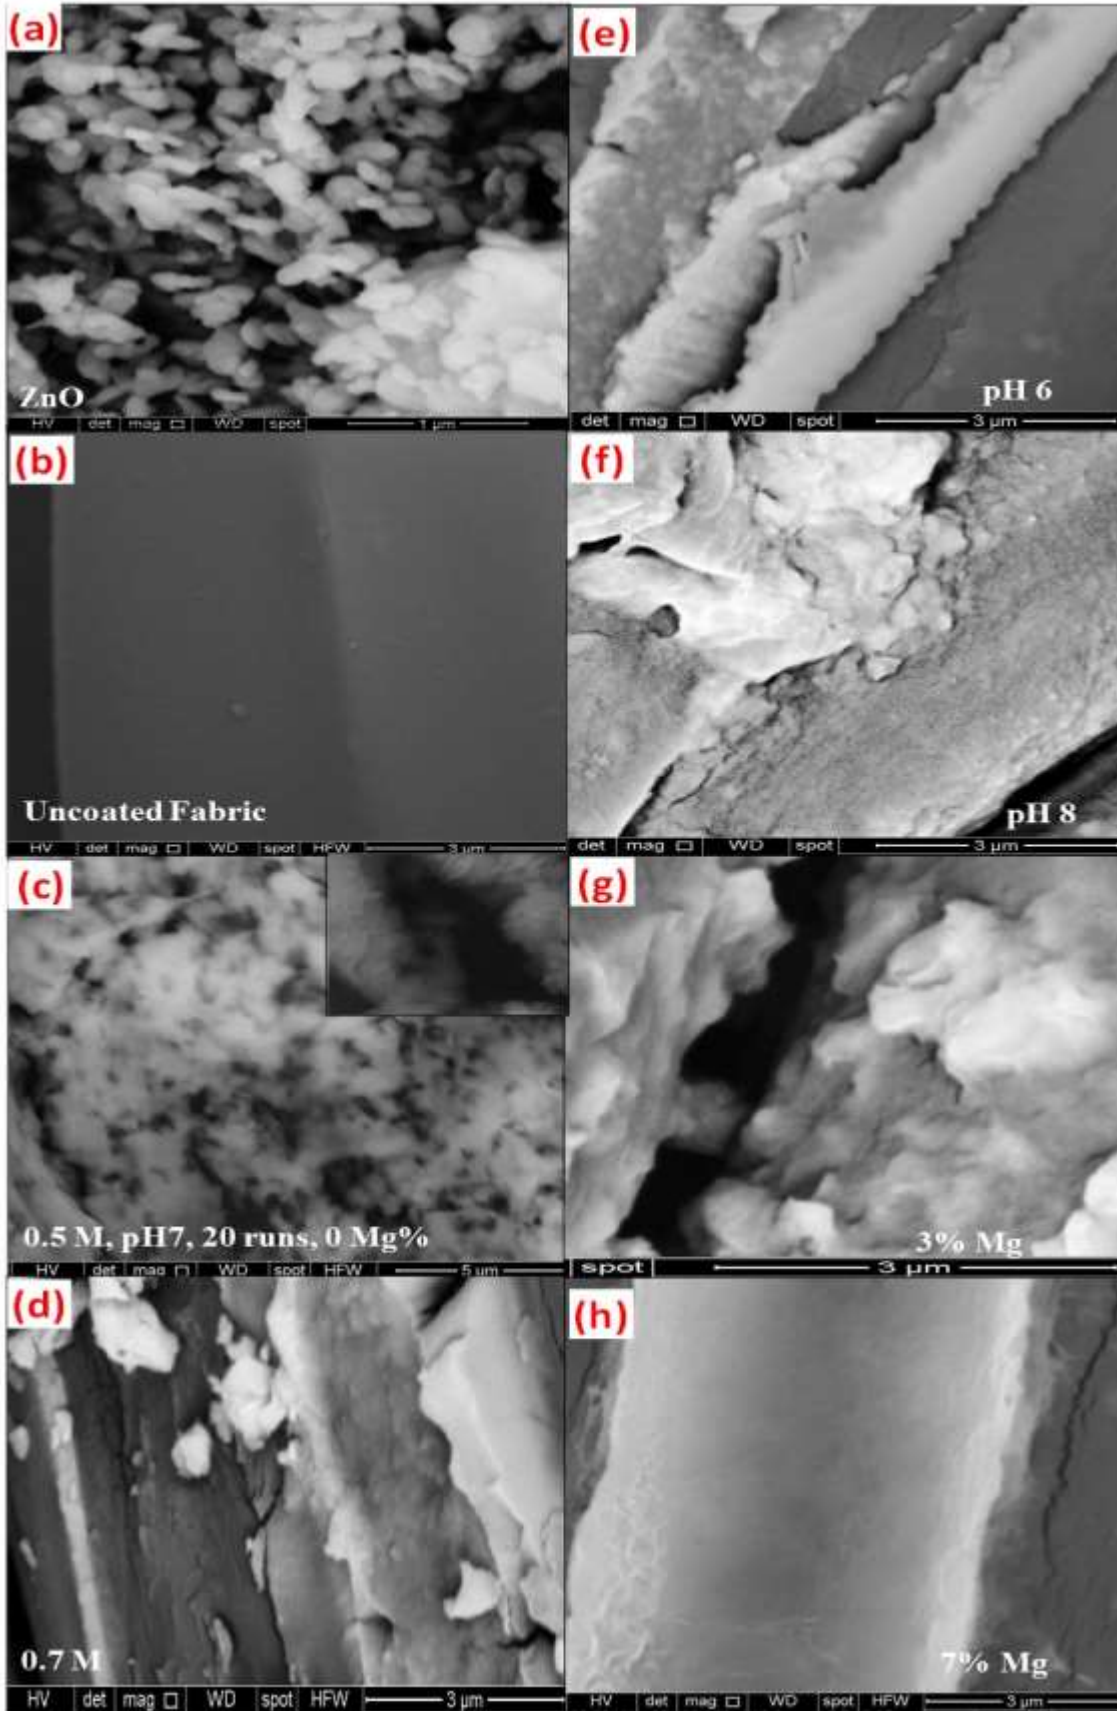

Figure S1. SEM images of (a) ZnO nanoparticles;(b) untreated cotton fabric; ZnO coated fabric at different concentrations of ZnO precursor solution: (c) 0.5 M and (d) 0.7 M at pH 7 and 20 runs; at different pH values: (e) pH 6 and (f) pH 8 at 0.5M precursor concentration and 20 runs; at different Mg doping percent: (g) 3% Mg and (h) 7% Mg at 0.5M precursor concentration, pH 7 and 20 runs.
